# Supplementary material
Source: PubMed Central journal article supplement (PMC6130889)
Supplement: NIHMS977467-supplement-2.pdf [file NIHMS977467-supplement-2.pdf]

## Supplementary Table 1. Codon usage for Cas9 variants

| Amino Acid | Codon | RA (Cas9n) | BE3 (Cas9n) | SpCas9 | xCas9 | Human codon frequency |
|------------|-------|------------|-------------|--------|-------|-----------------------|
| Ala        | GCG   | 0.01       | 0.24        | 0.14   | 0.14  | 0.11                  |
|            | GCA   | 0.04       | 0.26        | 0.24   | 0.25  | 0.23                  |
|            | GCT   | 0.05       | 0.26        | 0.49   | 0.25  | 0.26                  |
|            | GCC   | 0.9        | 0.24        | 0.14   | 0.36  | 0.4                   |
| Cys        | TGT   | 0          | 0.5         | 1      | 0.5   | 0.45                  |
|            | TGC   | 1          | 0.5         | 0      | 0.5   | 0.55                  |
| Asp        | GAT   | 0.22       | 0.52        | 0.8    | 0.46  | 0.46                  |
|            | GAC   | 0.78       | 0.48        | 0.2    | 0.54  | 0.54                  |
| Glu        | GAG   | 0.66       | 0.45        | 0.26   | 0.53  | 0.58                  |
|            | GAA   | 0.34       | 0.55        | 0.74   | 0.47  | 0.42                  |
| Phe        | TTT   | 0.19       | 0.51        | 0.81   | 0.41  | 0.45                  |
|            | TTC   | 0.81       | 0.49        | 0.19   | 0.59  | 0.55                  |
| Gly        | GGG   | 0.04       | 0.24        | 0.12   | 0.22  | 0.25                  |
|            | GGA   | 0.18       | 0.26        | 0.36   | 0.33  | 0.25                  |
|            | GGT   | 0.01       | 0.26        | 0.38   | 0.12  | 0.16                  |
|            | GGC   | 0.77       | 0.24        | 0.14   | 0.33  | 0.34                  |
| His        | CAT   | 0.06       | 0.53        | 0.88   | 0.34  | 0.41                  |
|            | CAC   | 0.94       | 0.47        | 0.13   | 0.66  | 0.59                  |
| Ile        | ATA   | 0          | 0.33        | 0.1    | 0.08  | 0.16                  |
|            | ATT   | 0.12       | 0.33        | 0.63   | 0.31  | 0.36                  |
|            | ATC   | 0.88       | 0.34        | 0.27   | 0.61  | 0.48                  |
| Lys        | AAG   | 0.76       | 0.51        | 0.27   | 0.52  | 0.58                  |
|            | AAA   | 0.24       | 0.49        | 0.73   | 0.48  | 0.42                  |
| Leu        | TTG   | 0          | 0.17        | 0.28   | 0.11  | 0.13                  |
|            | TTA   | 0          | 0.18        | 0.34   | 0     | 0.07                  |
|            | CTG   | 0.98       | 0.16        | 0.05   | 0.45  | 0.41                  |
|            | CTA   | 0          | 0.16        | 0.09   | 0     | 0.07                  |
|            | CTT   | 0          | 0.17        | 0.18   | 0.15  | 0.13                  |
|            | CTC   | 0.02       | 0.16        | 0.06   | 0.28  | 0.2                   |
| Asn        | AAT   | 0.19       | 0.5         | 0.8    | 0.41  | 0.46                  |
|            | AAC   | 0.81       | 0.5         | 0.2    | 0.59  | 0.54                  |
| Pro        | CCG   | 0.03       | 0.22        | 0.06   | 0.14  | 0.11                  |
|            | CCA   | 0.08       | 0.25        | 0.54   | 0.2   | 0.27                  |
|            | CCT   | 0.21       | 0.25        | 0.26   | 0.17  | 0.28                  |
| Gln        | CCC   | 0.68       | 0.28        | 0.14   | 0.49  | 0.33                  |
|            | CAG   | 0.96       | 0.5         | 0.27   | 0.77  | 0.75                  |
| Arg        | CAA   | 0.04       | 0.5         | 0.73   | 0.23  | 0.25                  |
|            | AGG   | 0.06       | 0.17        | 0.04   | 0.25  | 0.2                   |
|            | AGA   | 0.37       | 0.15        | 0.16   | 0.2   | 0.2                   |
|            | CGG   | 0.53       | 0.17        | 0.08   | 0.26  | 0.21                  |
|            | CGA   | 0          | 0.17        | 0.19   | 0.12  | 0.11                  |
|            | CGT   | 0          | 0.18        | 0.35   | 0     | 0.08                  |
| Ser        | CGC   | 0.04       | 0.17        | 0.18   | 0.17  | 0.19                  |
|            | AGT   | 0.01       | 0.15        | 0.34   | 0.15  | 0.15                  |
|            | AGC   | 0.62       | 0.16        | 0.05   | 0.21  | 0.24                  |
|            | TCG   | 0          | 0.16        | 0.07   | 0     | 0.06                  |
|            | TCA   | 0          | 0.16        | 0.26   | 0.11  | 0.15                  |
|            | TCT   | 0.09       | 0.18        | 0.21   | 0.31  | 0.18                  |
| Thr        | TCC   | 0.28       | 0.18        | 0.07   | 0.23  | 0.22                  |
|            | ACG   | 0.02       | 0.25        | 0.11   | 0.12  | 0.12                  |
|            | ACA   | 0.14       | 0.25        | 0.37   | 0.29  | 0.28                  |
|            | ACT   | 0.02       | 0.26        | 0.38   | 0.2   | 0.24                  |
| Val        | ACC   | 0.83       | 0.25        | 0.14   | 0.39  | 0.36                  |
|            | GTG   | 0.95       | 0.24        | 0.19   | 0.39  | 0.47                  |
|            | GTA   | 0          | 0.24        | 0.21   | 0.09  | 0.11                  |
|            | GTT   | 0          | 0.26        | 0.42   | 0.24  | 0.18                  |
| Tyr        | GTC   | 0.05       | 0.26        | 0.18   | 0.27  | 0.24                  |
|            | TAT   | 0.14       | 0.5         | 0.85   | 0.31  | 0.43                  |
| Met        | TAC   | 0.86       | 0.5         | 0.15   | 0.69  | 0.57                  |
|            | ATG   | 1          | 1           | 1      | 1     | 1                     |
| Trp        | TGG   | 1          | 1           | 1      | 1     | 1                     |

## Supplementary Table 2. Oligonucleotides for sgRNA cloning

| sgRNA Oligo     | Sequence                  |
|-----------------|---------------------------|
| FANCF-S1_A      | CACCGGAATCCCTTCTGCAGCACC  |
| FANCF-S1_B      | AAACGGTGCTGCAGAAGGGATTCC  |
| CTNNB1_S45_BE_A | CACCGCTCCTTCTCTGAGTGGTAA  |
| CTNNB1_S45_BE_B | AAACTTACCACTCAGAGAAGGAGC  |
| Apc_492_BE_A    | CACCGGGTCAGGGGCTTTCAGGTG  |
| Apc_492_BE_B    | AAACCACCTGAAAGCCCCTGACCC  |
| Apc_1405_BE_A   | CACCGTTCAGAGTGAGCCATGTAG  |
| Apc_1405_BE_B   | AAACCTACATGGCTCACTCTGAAC  |
| Apc_1529_BE_A   | CACCGCAGTTCAGGAAAACGACAA  |
| Apc_1529_BE_B   | AAACTTGTGTTTTCTGAACTGC    |
| Pik3ca_545_BE_A | CACCGGTTCACTGATTTTCAGATAG |
| Pik3ca_545_BE_B | AAACCTATCTGAAATCACTGAACC  |
| p53_270C_BE_A   | CACCGTTCGTGTTTTGTGCCCTGCC |
| p53_270C_BE_B   | AAACGGGCAGGCACAAACACGAAC  |
| CR8_OS2_A       | CACCGAAGCTCAGAAGGCTTGCTG  |
| CR8_OS2_B       | AAACCAGCAAGCCTTCTGAGCTTC  |
| Ctnnb1_S45_BE_B | CACCGCTCCTTCCCTGAGTGGCAA  |
| Ctnnb1_S45_BE_A | AAACTTGCCACTCAGGGAAGGAGC  |
| Kras_A          | CACCGAACTTGTGGTGGTTGGAGC  |
| Kras_B          | AAACGCTCCAACCACCACAAGTTC  |
| p53_A           | CACCGACCCGTGCACCGAGACCCC  |
| p53_B           | AAACGGGGTCTCGGTGACAGGGTC  |

## Supplementary Table 3. Primers for cloning

| Primer                    | Sequence                                                                                                                                                                                                          |
|---------------------------|-------------------------------------------------------------------------------------------------------------------------------------------------------------------------------------------------------------------|
| BE3-2X NLS<br>(Ultramer)  | AAAGCGGCAGCGAGACTCCCCCAAAGAAGAAACGGAAAGTAGGCGGCTCCCCAAGAAGAAGCGGAAGGTAGGGACCTCA<br>GAGTCCGCCAC                                                                                                                    |
| T7-FLAG-NLS<br>(Ultramer) | AACCGTCAGATCCGCTAGAGATCCTAATACGACTCACTATAGGGAGAGCCGCCACCATGGACTATAAGGACCACGACGGA<br>GACTACAAGGATCATGATATTGATTACAAAGACGATGACGATAAGATGGCCCCAAAGAAGAAGCGGAAGGTTCGGTATCC<br>ACGGAGTCCCAGCAGCCATGAGCTCAGAGACTGGCCCAAGT |
| XTEN-NLS_F                | AAAGCGGCAGCGAGACTCCC                                                                                                                                                                                              |
| XTEN-NLS_R                | GTGGCGGACTCTGAGGTCCC                                                                                                                                                                                              |
| T7-FLAG_F                 | AACCGTCAGATCCGCTAGAG                                                                                                                                                                                              |
| T7-FLAG_R                 | CACTGGGCCAGTCTCTGAGC                                                                                                                                                                                              |
| FSR-16                    | AAACCGCTGTTTCTAGGAATCCCGAGGCCCTTACCGGGTAGGGGAGGCGCT                                                                                                                                                               |
| FSR-17                    | AGAGTAATTAACCCCAAACAACAACGTTTTTACCCGGGAGCATGTCAAG                                                                                                                                                                 |
| FSR-19                    | GATCAGTGTGAGGAGTGTAAAGCTGGTTTTTCGAGTGGCTCCGGTGCCCGT                                                                                                                                                               |
| FSR-20                    | AAACGATCGCACAGCTAGCGTTTCGAGTTAGCCCGCTCACGACACCTGTGTT                                                                                                                                                              |
| FSR-114                   | CTAACTCGAACGCTAGCTGTGCGATCGTTTTGCCACCATGAGCTCAGAGACT                                                                                                                                                              |
| FSR-115                   | AGGCCTCGGGATTCTTAGGAACAGCGGTTTTCAATGGTGATGGTGATGATG                                                                                                                                                               |
| BE3RA-PGKPuro_F           | GTGACGCGGCTAACTCGAACGCTAGCCACCATGAGCTCAGAGACT                                                                                                                                                                     |
| BE3RA-PGKPuro_R           | CCGGTAGAGGCCTCGGGATTCCTAGTTAGACTTTCCTCTCTTCTTG                                                                                                                                                                    |
| BE3RA_APOBEC_F            | ACACAGGTGTCGTGACGCGGATCCTAACTCGAACGCTAGCTGTG                                                                                                                                                                      |
| BE3RA_XTEN_R              | ACTTCTTGTCACTTTCGGGTGTGGCGGACT                                                                                                                                                                                    |
| BE3RA_Cas9n_F             | ACCCGAAAGTGACAAGAAGTACAGCATCGG                                                                                                                                                                                    |
| BE3RA_Cas9n_R             | ATCCGCCTGAATCGCCTCCAGCTGAGACA                                                                                                                                                                                     |
| BE3RA_UGI_F               | GGGAGGCGATTACGCGGATCTACTAATCTGTGCTAG                                                                                                                                                                              |
| BE3RA_UGI_R               | AAGTTGGTGGCGCCGCTGCCGCTAGCGACTTTCCTCTTCTTCTTG                                                                                                                                                                     |
| BamHI-FLAG_F              | ACGCGGGATCCGCCACCATGGACTATAAGGAC                                                                                                                                                                                  |
| APOBEC-RI_R               | ATACCTTGACAGGAATTCAGT                                                                                                                                                                                             |
| 3G_F                      | GATCCAGTTTGGTTAGTACCAGGCGATTCTAGATTCGAGTTTAC                                                                                                                                                                      |
| 3G_R                      | GGATCCAACGCAAGCTCGACT                                                                                                                                                                                             |
| APOBEC_F                  | AGTCGAGCTTGCGTTGGATCCGCCACCATGAGCTCAGAGACTG                                                                                                                                                                       |
| BE3RA_XTEN_R              | ACTTCTTGTCACTTTCGGGTGTGGCGGACT                                                                                                                                                                                    |
| APOBEC_F                  | AGTCGAGCTTGCGTTGGATCCGCCACCATGAGCTCAGAGACTG                                                                                                                                                                       |
| BE3RA_XTEN_R              | ACTTCTTGTCACTTTCGGGTGTGGCGGACT                                                                                                                                                                                    |
| FNLS-APOBEC_F             | AGTCGAGCTTGCGTTGGATCCGCCACCATGAGCTATAAGGAC                                                                                                                                                                        |
| BE3RA_XTEN_R              | ACTTCTTGTCACTTTCGGGTGTGGCGGACT                                                                                                                                                                                    |
| cTRE_BE3_F                | CCATCCACGCTCGAGTTCATCCACGAGCTCAGAGACT                                                                                                                                                                             |
| cTRE_BE3_R                | AGTTCTCAACGCTCGACTGCCCGTTAGACTTTCCTCTTC                                                                                                                                                                           |
| pLRT2B_EFs_F              | CAGCAGAGATCCACTTTGGCGCCGGCTCGAGTACACGCGTCGAGAAGCTTG                                                                                                                                                               |
| pLRT2B_WPRE_R             | CCAGAGGTTGATTGTCGACTTAACGCGCTTGTACATCTAGAGGGATCCCACTGATTGCTAGCGGATCTT                                                                                                                                             |
| APOBEC_F2                 | AGATCGCCTGGAGACGCCATCCACGCTCGAGCCACCATGAGCTCAGAGACTG                                                                                                                                                              |
| APOBEC_R2                 | GCAGGTAGTACAGGTACAGC                                                                                                                                                                                              |
| KJ_Cas9_F                 | AACACAGGTGTCGTGACGCGGGATCCGCCACCATGGATAAAAAGTATT                                                                                                                                                                  |
| KJ_Cas9_R                 | AAGTTGGTGGCGCCGCTGCCGCTAGCTCCTGCAGCCTTGTTCATCGT                                                                                                                                                                   |
| Cas9_RA5_F                | TGAGGAAAACGAGGACATTC                                                                                                                                                                                              |
| Cas9_RA5_R                | ACTCTTTGCTGAAGCCGCCT                                                                                                                                                                                              |
| Cas9_RA3_F                | AGGCGGCTTCAGCAAAGAGT                                                                                                                                                                                              |
| Cas9_RA3_R                | AAGTTGGTGGCGCCGCTGCCGCTAGCTTTCCTTTTCTTAGCTTGAC                                                                                                                                                                    |
| EF1s_xCas9_AF             | TGCCGCCAGAACACAGGTGTC                                                                                                                                                                                             |
| xCas9_AR                  | CTGCAGTTTGGTATCCTCGGCCAGGTGCAAGT                                                                                                                                                                                  |
| xCas9_BF                  | TGGCCGAGGATACCAAACCTGCAGCTGAGCAAGG                                                                                                                                                                                |
| xCas9_BR                  | GTGCAGGCTATCGCCCTGGCC                                                                                                                                                                                             |
| xCas9_CF                  | AAGCCAGGTGTCGGCCAGG                                                                                                                                                                                               |
| xCas9_CR                  | CCCTTCTGCAGCACGCCGGCAGAGCCAGCATTC                                                                                                                                                                                 |
| xCas9_DF                  | CCTCTGCCCGCTGCTGCAGAAGGAAACGAACT                                                                                                                                                                                  |
| xCas9_DR                  | GGCTGAAGTTGGTGGCGCCGC                                                                                                                                                                                             |

## Supplementary Table 4. Primers for MiSeq and T7 endonuclease analysis

| Primer             | Sequence                 |
|--------------------|--------------------------|
| FANCF-S1_miseq_F   | GCCCTCTTGCCTCCACTGGTTG   |
| FANCF-S1_miseq_R   | CGCGGATGTTCCAATCAGTACGC  |
| CTNNB1_S45_miseq_F | TCAATGGGTCATATCACAGATTCT |
| CTNNB1_S45_miseq_R | TCCTCTTCCTCAGGATTGCC     |
| 492_miseq_F        | TCAGGTAGGAAGGCTACCCG     |
| 492_miseq_R        | CTTCCCCCTTCTGCCAAGTC     |
| 1405_miseq_F1      | TGTTGAGTTTTCTTCAGGAGCC   |
| 1405_miseq_R2      | TGGTCTGCCCAGGACTATCT     |
| 1529_miseq_F       | ACTTTGTTACACTTCGCCACAG   |
| 1529_miseq_R       | TTTCAGAGTCAGGCTTTTCTACCT |
| Pik3ca_miseq_F     | GCACCAGTTTGCTTTTTCAAAT   |
| Pik3ca_miseq_R     | CCTTCAGCCTTGAGAGCCTC     |
| CR8_miseq_F        | GTCTTCTGATTGCCCTCCCC     |
| CR8_miseq_R        | GCCTGTGTTCCTTCTGCCTA     |
| S45_miseq_F1       | ACTCTGTTTTTACAGCTGACCTGA |
| S45_miseq_R1       | GACTGGGAAAAGCCTTGCTC     |
| Kras_F             | GCAGACTGTAGAGCAGCGTT     |
| Kras_R             | ATGTCTTTCCCCAGCACAGT     |
| p53_F              | TTTGAAGGCCCAAGTGAAG      |
| p53_R              | CCACTCACCGTGCACATAAC     |
| Nras_F             | TTTCCCGTAAACTGAGGGCG     |
| Nras_R             | GCTGGGCCTCACCTCTATGGT    |
| Elk3_F             | ACACCCAGACAATGCCAACT     |
| Elk3_R             | TGCTCTGAGAAGATGCTCCA     |
| CTNNB1.OT1F        | TGGAGGGTGGTCTGAATGTC     |
| CTNNB1.OT1R        | GTCTCGATCTCCTGACCTCG     |
| CTNNB1.OT2F        | TTGGAACCAGGAGGGACTTC     |
| CTNNB1.OT2R        | AGTGGCTCTGGTTTCAAGGT     |
| Apc492.OT1F        | GGATGCTTTCAGAAGGAGG      |
| Apc492.OT1R        | TGCCCTCAAGGTTGTTGTTG     |
| Apc492.OT2F        | CAGGCAGAGCTCTAGGAGAG     |
| Apc492.OT2R        | GGTCTCATCCCACTTGCTCT     |
| Apc1405.OT1F       | TGGGGTGGGAAATGCTACTC     |
| Apc1405.OT1R       | GTCCACGAGAAGTGCACAAA     |
| Apc1405.OT2F       | TGTGTACCAGGAAGAACACT     |
| Apc1405.OT2R       | TGCCCCAGAGACTGAAAAT      |
| Pik3ca545.OT1F     | TTTAGCTGGGTGTGTGGACT     |
| Pik3ca545.OT1R     | CAGGCAATCAGTGTATGCATTT   |

## Supplementary Table 5. geneBlocks

| Name    | Sequence                                                                                                                                                                                                                                                                                                                                                                                                                                                                                                                                                                                                                                                                                                                                                                                                                                                                                                                                                                                                                                                                                                                                                                                                                                                                                                                                                                                                                                                                                                                                                                                                                   |
|---------|----------------------------------------------------------------------------------------------------------------------------------------------------------------------------------------------------------------------------------------------------------------------------------------------------------------------------------------------------------------------------------------------------------------------------------------------------------------------------------------------------------------------------------------------------------------------------------------------------------------------------------------------------------------------------------------------------------------------------------------------------------------------------------------------------------------------------------------------------------------------------------------------------------------------------------------------------------------------------------------------------------------------------------------------------------------------------------------------------------------------------------------------------------------------------------------------------------------------------------------------------------------------------------------------------------------------------------------------------------------------------------------------------------------------------------------------------------------------------------------------------------------------------------------------------------------------------------------------------------------------------|
| VQR_GB  | AGGCGGCTTCAGCAAAGAGTCTATCCTGCCCAAGAGGAACAGCGATAAGCTGATCGCCAGAAAGAAGGACTGGGACC<br>CTAAGAAGTACGGCGGCTTCGTACGCCCCACCGTGGCCTATTCTGTGCTGGTGGTGCCCAAAGTGGAAAAGGGCAA<br>GTCCAAGAACTGAAGAGTGTGAAAGAGCTGCTGGGGATCACCATCATGGAAAGAAGCAGCTTCGAGAAGAATCCC<br>ATCGACTTTCTGGAAGCCAAGGGCTACAAAGAAGTGAAAAAGGACCTGATCATCAAGCTGCCTAAGTACTCCCTGTT<br>CGAGCTGGAAAACGGCCGGAAGAGAATGCTGGCCTCTGCCGGCGAACTGCAGAAGGGAAACGAACCTGGCCCTGCC<br>CTCCAAATATGTGAACTTCCTGTACCTGGCCAGCCACTATGAGAAGCTGAAGGGCTCCCCGAGGATAATGAGCAG<br>AAACAGCTGTTTGTGGAACAGCACAAAGCACTACCTGGACGAGATCATCGAGCAGATCAGCGAGTTCTCCAAGAGAG<br>TGATCCTGGCCGACGCTAATCTGGACAAAGTGCTGCCGCCTACAACAAGCACCCGGGATAAGCCCATCAGAGAGCA<br>GGCCGAGAATATCATCCACCTGTTTACCCTGACCAATCTGGGAGCCCCTGCCGCCTTCAAGTACTTTGACACCACCA<br>TCGACCGGAAGCAGTACAGGAGCACCAAGAGGTGCTGGACGCCACCCTGATCCACCAGAGCATCACCGGCCTGT<br>ACGAGACACGGATCGACCTGTCTCAGCTGGGAGGCGACAAGCGTCTCTGCTACTAAGAAAGCTGGTCAAGCTAA<br>GAAAAAGAAAGCTAGCGGCAGCGGCCACCAACT                                                                                                                                                                                                                                                                                                                                                                                                                                                                                                                                                                                                                                                                            |
| VRER_GB | AGGCGGCTTCAGCAAAGAGTCTATCCTGCCCAAGAGGAACAGCGATAAGCTGATCGCCAGAAAGAAGGACTGGGACC<br>CTAAGAAGTACGGCGGCTTCGTACGCCCCACCGTGGCCTATTCTGTGCTGGTGGTGCCCAAAGTGGAAAAGGGCAA<br>GTCCAAGAACTGAAGAGTGTGAAAGAGCTGCTGGGGATCACCATCATGGAAAGAAGCAGCTTCGAGAAGAATCCC<br>ATCGACTTTCTGGAAGCCAAGGGCTACAAAGAAGTGAAAAAGGACCTGATCATCAAGCTGCCTAAGTACTCCCTGTT<br>CGAGCTGGAAAACGGCCGGAAGAGAATGCTGGCCTCTGCCAGGAACTGCAGAAGGGAAACGAACCTGGCCCTGCC<br>CTCCAAATATGTGAACTTCCTGTACCTGGCCAGCCACTATGAGAAGCTGAAGGGCTCCCCGAGGATAATGAGCAG<br>AAACAGCTGTTTGTGGAACAGCACAAAGCACTACCTGGACGAGATCATCGAGCAGATCAGCGAGTTCTCCAAGAGAG<br>TGATCCTGGCCGACGCTAATCTGGACAAAGTGCTGCCGCCTACAACAAGCACCCGGGATAAGCCCATCAGAGAGCA<br>GGCCGAGAATATCATCCACCTGTTTACCCTGACCAATCTGGGAGCCCCTGCCGCCTTCAAGTACTTTGACACCACCA<br>TCGACCGGAAGGAGTACAGGAGCACCAAGAGGTGCTGGACGCCACCCTGATCCACCAGAGCATCACCGGCCTGT<br>ACGAGACACGGATCGACCTGTCTCAGCTGGGAGGCGACAAGCGTCTCTGCTACTAAGAAAGCTGGTCAAGCTAA<br>GAAAAAGAAAGCTAGCGGCAGCGGCCACCAACT                                                                                                                                                                                                                                                                                                                                                                                                                                                                                                                                                                                                                                                                             |
| HF1_GB  | TGAGGAAAACGAGGACATTCTGGAAGATATCGTGCTGACCCTGACACTGTTTGAGGACAGAGAGATGATCGAGGAAC<br>GGCTGAAAACCTATGCCACCTGTTTCGACGACAAAGTGATGAAGCAGCTGAAGCGGGCGGAGATACACCGGCTGGG<br>GCGCCCTGAGCCGGAAGCTGATCAACGGCATCCGGGACAAGCAGTCCGGCAAGACAATCTGGATTTCTGAAGT<br>CGACGGCTTCGCCAACAGAAAACCTCATGGCCCTGATCCACGACGACAGCCTGACCTTTAAAGAGGACATCCAGAAA<br>GCCCAGGTGTCCGGCCAGGGCGATAGCCTGCACGAGCACATTGCCAATCTGGCCGGCAGCCCCGCCATTAAGAAG<br>GGCATCCTCGACAGAGTGAAGGTGGTGGACGAGCTCGTGAAAGTGATGGGCCGGCACAAGCCCGAGAACATCGTG<br>ATCGAAATGGCCAGAGAGAACCAGACCACCCAGAAGGGACAGAAGAACAGCCGCGAGAGAATGAAGCGGATCGAA<br>GAGGGCATCAAAGAGCTGGGCAGCCAGATCCTGAAAGAACACCCCGTGAAAAACACCCAGCTGCAGAACGAGAAG<br>CTGTACTCTACTACCTGCAGAATGGGCGGGATATGTACGTGGACCAGGAACTGGACATCAACCGGCTGTCCGACT<br>ACGATGTGGACCATATCGTGCTCAGAGCTTTCTGAAGGACGACTCCTCGACAACAAGGTGCTGACCAGAAGCGA<br>CAAGAACCGGGCAAGAGCGACAACGTGCCCTCCGAAGAGGTCTGAAGAAGATGAAGAACTACTGGCGGCAGCT<br>GCTGAACGCCAAGCTGATTACCCAGAGAAAGTTCGACAATCTGACCAAGGCCGAGAGAGCGGCCTGAGCGAACT<br>GGATAAGGCCGGCTTCATCAAGAGACAGCTGGTGGAAACCCGGGCCATCACAAGCACAGTGGCACAGATCCTGGA<br>CTCCCGATGAACACTAAGTACGACGAGAATGACAAGCTGATCCGGGAAGTGAAAGTGATCACCTGAAGTCCAAG<br>CTGGTGTCCGATTTCCGGAAGGATTTCCAGTTTTACAAAGTGCGCGAGATCAACAACCTACCACCACGCCACGACGC<br>CTACCTGAACGCCGTCTGGGAACCGCCCTGATCAAAAAGTACCCTAAGCTGGAAAGCGAGTTCTGTACGGCGAC<br>TACAAGGTGTACGACGTGCGGAAGATGATCGCCAAGAGCGAGCAGGAAATCGGCAAGGCTACCGCCAAGTACTTCT<br>TCTACAGCAACATCATGAACTTTTTCAAGACCGAGATTACCCTGGCCAACGGCGAGATCCGGAAGCGGCCTCTGATC<br>GAGACAAACGGCGAAACCGGGGAGATCGTGTGGGATAAGGGCCGGGATTTGCCACCGTGCAGAAAGTGCTGAGC<br>ATGCCCAAGTGAATATCGTGAAAAAGACCGAGGTGCAGACAGGCGGCTTCAGCAAAGAGT |

## Supplementary Table 6: P-values

### Values for Figure 1f (BE3 vs RA)

| Sidak's multiple comparisons test | 95.00% CI of diff. | Significant? | Summary | Adjusted P Value |
|-----------------------------------|--------------------|--------------|---------|------------------|
| <b>DAY 2</b>                      |                    |              |         |                  |
| Apc.492                           | -50.61 to -29.75   | Yes          | ****    | <0.0001          |
| Apc.1405                          | -51.84 to -30.98   | Yes          | ****    | <0.0001          |
| Apc.1529                          | -45.97 to -25.11   | Yes          | ****    | <0.0001          |
| Pik3ca.545                        | -26.14 to -5.277   | Yes          | **      | 0.0014           |
| CR8.OS2-C5                        | -29.8 to -8.94     | Yes          | ***     | 0.0001           |
| CR8.OS2-C7                        | -35.07 to -14.21   | Yes          | ****    | <0.0001          |
| <b>DAY 6</b>                      |                    |              |         |                  |
| Apc.492                           | -57.54 to -33.44   | Yes          | ****    | <0.0001          |
| Apc.1405                          | -63.9 to -42.34    | Yes          | ****    | <0.0001          |
| Apc.1529                          | -58.6 to -37.04    | Yes          | ****    | <0.0001          |
| Pik3ca.545                        | -39.77 to -18.21   | Yes          | ****    | <0.0001          |
| CR8.OS2-C5                        | -42.03 to -20.47   | Yes          | ****    | <0.0001          |
| CR8.OS2-C7                        | -49.8 to -28.24    | Yes          | ****    | <0.0001          |

## Values for Figure 2d, Supplementary Figure 7a and Supplementary Figure 11 (RA vs 2X vs FNLS)

### DAY 2

| Tukey's multiple comparisons test | 95.00% CI of diff. | Significant? | Summary | Adjusted P Value |
|-----------------------------------|--------------------|--------------|---------|------------------|
| Apc.492 (Day 2)                   |                    |              |         |                  |
| BE3RA-P2A-Puro vs. FNLS-P2A-Puro  | -29.07 to -7.013   | Yes          | ***     | 0.0010           |
| BE3RA-P2A-Puro vs. 2X-P2A-Puro    | -25.16 to -3.106   | Yes          | **      | 0.0098           |
| FNLS-P2A-Puro vs. 2X-P2A-Puro     | -7.121 to 14.93    | No           | ns      | 0.6610           |
| Apc.1405 (Day 2)                  |                    |              |         |                  |
| BE3RA-P2A-Puro vs. FNLS-P2A-Puro  | -32.84 to -10.79   | Yes          | ****    | <0.0001          |
| BE3RA-P2A-Puro vs. 2X-P2A-Puro    | -21.35 to 0.7074   | No           | ns      | 0.0701           |
| FNLS-P2A-Puro vs. 2X-P2A-Puro     | 0.4659 to 22.52    | Yes          | *       | 0.0397           |
| Apc.1529 (Day 2)                  |                    |              |         |                  |
| BE3RA-P2A-Puro vs. FNLS-P2A-Puro  | -35 to -12.94      | Yes          | ****    | <0.0001          |
| BE3RA-P2A-Puro vs. 2X-P2A-Puro    | -23.49 to -1.439   | Yes          | *       | 0.0241           |
| FNLS-P2A-Puro vs. 2X-P2A-Puro     | 0.4759 to 22.53    | Yes          | *       | 0.0395           |
| Pik3ca.545 (Day 2)                |                    |              |         |                  |
| BE3RA-P2A-Puro vs. FNLS-P2A-Puro  | -35.62 to -13.56   | Yes          | ****    | <0.0001          |
| BE3RA-P2A-Puro vs. 2X-P2A-Puro    | -19.94 to 2.111    | No           | ns      | 0.1313           |
| FNLS-P2A-Puro vs. 2X-P2A-Puro     | 4.646 to 26.7      | Yes          | **      | 0.0041           |
| CR8.OS2-C5 (Day 2)                |                    |              |         |                  |
| BE3RA-P2A-Puro vs. FNLS-P2A-Puro  | -28.81 to -1.799   | Yes          | *       | 0.0237           |
| BE3RA-P2A-Puro vs. 2X-P2A-Puro    | -3.216 to 23.8     | No           | ns      | 0.1625           |
| FNLS-P2A-Puro vs. 2X-P2A-Puro     | 12.09 to 39.1      | Yes          | ***     | 0.0002           |
| CR8.OS2-C7 (Day 2)                |                    |              |         |                  |
| BE3RA-P2A-Puro vs. FNLS-P2A-Puro  | -37.95 to -10.94   | Yes          | ***     | 0.0003           |
| BE3RA-P2A-Puro vs. 2X-P2A-Puro    | -30.33 to -3.314   | Yes          | *       | 0.0122           |
| FNLS-P2A-Puro vs. 2X-P2A-Puro     | -5.881 to 21.13    | No           | ns      | 0.3578           |

### DAY 6

| Tukey's multiple comparisons test | 95.00% CI of diff. | Significant? | Summary | Adjusted P Value |
|-----------------------------------|--------------------|--------------|---------|------------------|
| Apc.492                           |                    |              |         |                  |
| BE3RA-P2A-Puro vs. FNLS-P2A-Puro  | -14.68 to 1.189    | No           | ns      | 0.1077           |
| BE3RA-P2A-Puro vs. 2X-P2A-Puro    | -12.76 to 3.109    | No           | ns      | 0.3057           |
| FNLS-P2A-Puro vs. 2X-P2A-Puro     | -6.012 to 9.852    | No           | ns      | 0.8229           |
| Apc.1405                          |                    |              |         |                  |
| BE3RA-P2A-Puro vs. FNLS-P2A-Puro  | -19.29 to -3.421   | Yes          | **      | 0.0038           |
| BE3RA-P2A-Puro vs. 2X-P2A-Puro    | -10.48 to 5.382    | No           | ns      | 0.7104           |
| FNLS-P2A-Puro vs. 2X-P2A-Puro     | 0.871 to 16.74     | Yes          | *       | 0.0272           |
| Apc.1529                          |                    |              |         |                  |
| BE3RA-P2A-Puro vs. FNLS-P2A-Puro  | -21.6 to -5.734    | Yes          | ***     | 0.0006           |
| BE3RA-P2A-Puro vs. 2X-P2A-Puro    | -12.83 to 3.036    | No           | ns      | 0.2953           |
| FNLS-P2A-Puro vs. 2X-P2A-Puro     | 0.8376 to 16.7     | Yes          | *       | 0.0278           |
| Pik3ca.545                        |                    |              |         |                  |
| BE3RA-P2A-Puro vs. FNLS-P2A-Puro  | -26.68 to -10.81   | Yes          | ****    | <0.0001          |
| BE3RA-P2A-Puro vs. 2X-P2A-Puro    | -14.28 to 1.586    | No           | ns      | 0.1365           |
| FNLS-P2A-Puro vs. 2X-P2A-Puro     | 4.464 to 20.33     | Yes          | **      | 0.0016           |
| CR8.OS2-C5                        |                    |              |         |                  |
| BE3RA-P2A-Puro vs. FNLS-P2A-Puro  | -21.7 to -2.265    | Yes          | *       | 0.0131           |
| BE3RA-P2A-Puro vs. 2X-P2A-Puro    | 11.67 to 31.1      | Yes          | ****    | <0.0001          |
| FNLS-P2A-Puro vs. 2X-P2A-Puro     | 23.65 to 43.08     | Yes          | ****    | <0.0001          |
| CR8.OS2-C7                        |                    |              |         |                  |
| BE3RA-P2A-Puro vs. FNLS-P2A-Puro  | -27.88 to -8.45    | Yes          | ***     | 0.0002           |
| BE3RA-P2A-Puro vs. 2X-P2A-Puro    | -21.68 to -2.25    | Yes          | *       | 0.0133           |
| FNLS-P2A-Puro vs. 2X-P2A-Puro     | -3.515 to 15.92    | No           | ns      | 0.2726           |

## Values for Figure 2e (PC9 cells)

### FANCF

| Tukey's multiple comparisons test | 95.00% CI of diff. | Significant? | Summary | Adjusted P Value |
|-----------------------------------|--------------------|--------------|---------|------------------|
| <b>C6</b>                         |                    |              |         |                  |
| BE3-PGK-Puro vs. FNLS-P2A-Puro    | -77.03 to -73.09   | Yes          | ****    | <0.0001          |
| BE3-PGK-Puro vs. BE4Gam           | -73.8 to -69.86    | Yes          | ****    | <0.0001          |
| FNLS-P2A-Puro vs. BE4Gam          | 1.256 to 5.204     | Yes          | **      | 0.0012           |
| <b>C7</b>                         |                    |              |         |                  |
| BE3-PGK-Puro vs. FNLS-P2A-Puro    | -72.71 to -68.76   | Yes          | ****    | <0.0001          |
| BE3-PGK-Puro vs. BE4Gam           | -69.98 to -66.03   | Yes          | ****    | <0.0001          |
| FNLS-P2A-Puro vs. BE4Gam          | 0.753 to 4.7       | Yes          | **      | 0.0057           |
| <b>C8</b>                         |                    |              |         |                  |
| BE3-PGK-Puro vs. FNLS-P2A-Puro    | -73.16 to -69.21   | Yes          | ****    | <0.0001          |
| BE3-PGK-Puro vs. BE4Gam           | -69.49 to -65.54   | Yes          | ****    | <0.0001          |
| FNLS-P2A-Puro vs. BE4Gam          | 1.696 to 5.644     | Yes          | ***     | 0.0003           |
| <b>C11</b>                        |                    |              |         |                  |
| BE3-PGK-Puro vs. FNLS-P2A-Puro    | -45.22 to -41.28   | Yes          | ****    | <0.0001          |
| BE3-PGK-Puro vs. BE4Gam           | -44.02 to -40.07   | Yes          | ****    | <0.0001          |
| FNLS-P2A-Puro vs. BE4Gam          | -0.7704 to 3.177   | No           | ns      | 0.2985           |

### CTNNB1

| Tukey's multiple comparisons test | 95.00% CI of diff. | Significant? | Summary | Adjusted P Value |
|-----------------------------------|--------------------|--------------|---------|------------------|
| <b>C4</b>                         |                    |              |         |                  |
| BE3-PGK-Puro vs. FNLS-P2A-Puro    | -76.47 to -72.8    | Yes          | ****    | <0.0001          |
| BE3-PGK-Puro vs. BE4Gam           | -53.97 to -50.3    | Yes          | ****    | <0.0001          |
| FNLS-P2A-Puro vs. BE4Gam          | 20.67 to 24.33     | Yes          | ****    | <0.0001          |
| <b>C5</b>                         |                    |              |         |                  |
| BE3-PGK-Puro vs. FNLS-P2A-Puro    | -74.89 to -71.22   | Yes          | ****    | <0.0001          |
| BE3-PGK-Puro vs. BE4Gam           | -53.3 to -49.63    | Yes          | ****    | <0.0001          |
| FNLS-P2A-Puro vs. BE4Gam          | 19.76 to 23.42     | Yes          | ****    | <0.0001          |
| <b>C8</b>                         |                    |              |         |                  |
| BE3-PGK-Puro vs. FNLS-P2A-Puro    | -65.06 to -61.4    | Yes          | ****    | <0.0001          |
| BE3-PGK-Puro vs. BE4Gam           | -40.08 to -36.42   | Yes          | ****    | <0.0001          |
| FNLS-P2A-Puro vs. BE4Gam          | 23.15 to 26.81     | Yes          | ****    | <0.0001          |
| <b>C10</b>                        |                    |              |         |                  |
| BE3-PGK-Puro vs. FNLS-P2A-Puro    | -7.726 to -4.061   | Yes          | ****    | <0.0001          |
| BE3-PGK-Puro vs. BE4Gam           | -8.439 to -4.774   | Yes          | ****    | <0.0001          |
| FNLS-P2A-Puro vs. BE4Gam          | -2.546 to 1.119    | No           | ns      | 0.6010           |



## Values for Figure 2g (inducible 3T3 cells)

### Apc.1405

| Tukey's multiple comparisons test  | 95.00% CI of diff. | Significant? | Summary | Adjusted P Value |
|------------------------------------|--------------------|--------------|---------|------------------|
| TRE-BE3 (D2) vs. TRE-BE3RA (D2)    | -58.2 to -21.82    | Yes          | ****    | <0.0001          |
| TRE-BE3 (D2) vs. TRE-FNLS (D2)     | -67.33 to -30.95   | Yes          | ****    | <0.0001          |
| TRE-BE3 (D2) vs. TRE-BE3 (OFF)     | -14.81 to 21.57    | No           | ns      | 0.9989           |
| TRE-BE3 (D2) vs. TRE-BE3RA (OFF)   | -18.08 to 18.3     | No           | ns      | >0.9999          |
| TRE-BE3 (D2) vs. TRE-FNLS (OFF)    | -22.92 to 13.46    | No           | ns      | 0.9893           |
| TRE-BE3 (D2) vs. TRE-BE3 (D6)      | -21.72 to 14.66    | No           | ns      | 0.9985           |
| TRE-BE3 (D2) vs. TRE-BE3RA (D6)    | -80.58 to -44.2    | Yes          | ****    | <0.0001          |
| TRE-BE3 (D2) vs. TRE-FNLS (D6)     | -85.85 to -49.47   | Yes          | ****    | <0.0001          |
| TRE-BE3RA (D2) vs. TRE-FNLS (D2)   | -27.32 to 9.064    | No           | ns      | 0.7064           |
| TRE-BE3RA (D2) vs. TRE-BE3 (OFF)   | 25.2 to 61.58      | Yes          | ****    | <0.0001          |
| TRE-BE3RA (D2) vs. TRE-BE3RA (OFF) | 21.93 to 58.31     | Yes          | ****    | <0.0001          |
| TRE-BE3RA (D2) vs. TRE-FNLS (OFF)  | 17.09 to 53.47     | Yes          | ****    | <0.0001          |
| TRE-BE3RA (D2) vs. TRE-BE3 (D6)    | 18.3 to 54.68      | Yes          | ****    | <0.0001          |
| TRE-BE3RA (D2) vs. TRE-BE3RA (D6)  | -40.56 to -4.183   | Yes          | **      | 0.0098           |
| TRE-BE3RA (D2) vs. TRE-FNLS (D6)   | -45.83 to -9.453   | Yes          | **      | 0.0012           |
| TRE-FNLS (D2) vs. TRE-BE3 (OFF)    | 34.33 to 70.71     | Yes          | ****    | <0.0001          |
| TRE-FNLS (D2) vs. TRE-BE3RA (OFF)  | 31.06 to 67.44     | Yes          | ****    | <0.0001          |
| TRE-FNLS (D2) vs. TRE-FNLS (OFF)   | 26.22 to 62.6      | Yes          | ****    | <0.0001          |
| TRE-FNLS (D2) vs. TRE-BE3 (D6)     | 27.42 to 63.8      | Yes          | ****    | <0.0001          |
| TRE-FNLS (D2) vs. TRE-BE3RA (D6)   | -31.44 to 4.944    | No           | ns      | 0.2717           |
| TRE-FNLS (D2) vs. TRE-FNLS (D6)    | -36.71 to -0.3263  | Yes          | *       | 0.0442           |
| TRE-BE3 (OFF) vs. TRE-BE3RA (OFF)  | -21.46 to 14.92    | No           | ns      | 0.9991           |
| TRE-BE3 (OFF) vs. TRE-FNLS (OFF)   | -26.3 to 10.08     | No           | ns      | 0.8125           |
| TRE-BE3 (OFF) vs. TRE-BE3 (D6)     | -25.09 to 11.29    | No           | ns      | 0.9091           |
| TRE-BE3 (OFF) vs. TRE-BE3RA (D6)   | -83.95 to -47.57   | Yes          | ****    | <0.0001          |
| TRE-BE3 (OFF) vs. TRE-FNLS (D6)    | -89.22 to -52.84   | Yes          | ****    | <0.0001          |
| TRE-BE3RA (OFF) vs. TRE-FNLS (OFF) | -23.03 to 13.35    | No           | ns      | 0.9877           |
| TRE-BE3RA (OFF) vs. TRE-BE3 (D6)   | -21.82 to 14.56    | No           | ns      | 0.9982           |
| TRE-BE3RA (OFF) vs. TRE-BE3RA (D6) | -80.68 to -44.3    | Yes          | ****    | <0.0001          |
| TRE-BE3RA (OFF) vs. TRE-FNLS (D6)  | -85.95 to -49.57   | Yes          | ****    | <0.0001          |
| TRE-FNLS (OFF) vs. TRE-BE3 (D6)    | -16.99 to 19.39    | No           | ns      | >0.9999          |
| TRE-FNLS (OFF) vs. TRE-BE3RA (D6)  | -75.85 to -39.47   | Yes          | ****    | <0.0001          |
| TRE-FNLS (OFF) vs. TRE-FNLS (D6)   | -81.12 to -44.74   | Yes          | ****    | <0.0001          |
| TRE-BE3 (D6) vs. TRE-BE3RA (D6)    | -77.05 to -40.67   | Yes          | ****    | <0.0001          |
| TRE-BE3 (D6) vs. TRE-FNLS (D6)     | -82.32 to -45.94   | Yes          | ****    | <0.0001          |
| TRE-BE3RA (D6) vs. TRE-FNLS (D6)   | -23.46 to 12.92    | No           | ns      | 0.9792           |

### Pik3ca.545

| Tukey's multiple comparisons test  | 95.00% CI of diff. | Significant? | Summary | Adjusted P Value |
|------------------------------------|--------------------|--------------|---------|------------------|
| TRE-BE3 (D2) vs. TRE-BE3RA (D2)    | -50.76 to -13.65   | Yes          | ***     | 0.0003           |
| TRE-BE3 (D2) vs. TRE-FNLS (D2)     | -60.78 to -23.67   | Yes          | ****    | <0.0001          |
| TRE-BE3 (D2) vs. TRE-BE3 (OFF)     | -19.09 to 18.03    | No           | ns      | >0.9999          |
| TRE-BE3 (D2) vs. TRE-BE3RA (OFF)   | -19.25 to 17.87    | No           | ns      | >0.9999          |
| TRE-BE3 (D2) vs. TRE-FNLS (OFF)    | -23.16 to 13.95    | No           | ns      | 0.9920           |
| TRE-BE3 (D2) vs. TRE-BE3 (D6)      | -20.22 to 16.89    | No           | ns      | >0.9999          |
| TRE-BE3 (D2) vs. TRE-BE3RA (D6)    | -82.67 to -45.56   | Yes          | ****    | <0.0001          |
| TRE-BE3 (D2) vs. TRE-FNLS (D6)     | -87.33 to -50.22   | Yes          | ****    | <0.0001          |
| TRE-BE3RA (D2) vs. TRE-FNLS (D2)   | -28.58 to 8.538    | No           | ns      | 0.6270           |
| TRE-BE3RA (D2) vs. TRE-BE3 (OFF)   | 13.12 to 50.23     | Yes          | ***     | 0.0003           |
| TRE-BE3RA (D2) vs. TRE-BE3RA (OFF) | 12.96 to 50.07     | Yes          | ***     | 0.0003           |
| TRE-BE3RA (D2) vs. TRE-FNLS (OFF)  | 9.042 to 46.16     | Yes          | **      | 0.0015           |
| TRE-BE3RA (D2) vs. TRE-BE3 (D6)    | 11.98 to 49.1      | Yes          | ***     | 0.0005           |
| TRE-BE3RA (D2) vs. TRE-BE3RA (D6)  | -50.47 to -13.35   | Yes          | ***     | 0.0003           |
| TRE-BE3RA (D2) vs. TRE-FNLS (D6)   | -55.13 to -18.01   | Yes          | ****    | <0.0001          |
| TRE-FNLS (D2) vs. TRE-BE3 (OFF)    | 23.14 to 60.25     | Yes          | ****    | <0.0001          |
| TRE-FNLS (D2) vs. TRE-BE3RA (OFF)  | 22.98 to 60.09     | Yes          | ****    | <0.0001          |
| TRE-FNLS (D2) vs. TRE-FNLS (OFF)   | 19.06 to 56.18     | Yes          | ****    | <0.0001          |
| TRE-FNLS (D2) vs. TRE-BE3 (D6)     | 22 to 59.12        | Yes          | ****    | <0.0001          |
| TRE-FNLS (D2) vs. TRE-BE3RA (D6)   | -40.45 to -3.332   | Yes          | *       | 0.0141           |
| TRE-FNLS (D2) vs. TRE-FNLS (D6)    | -45.11 to -7.992   | Yes          | **      | 0.0023           |
| TRE-BE3 (OFF) vs. TRE-BE3RA (OFF)  | -18.72 to 18.4     | No           | ns      | >0.9999          |
| TRE-BE3 (OFF) vs. TRE-FNLS (OFF)   | -22.63 to 14.48    | No           | ns      | 0.9965           |
| TRE-BE3 (OFF) vs. TRE-BE3 (D6)     | -19.69 to 17.42    | No           | ns      | >0.9999          |
| TRE-BE3 (OFF) vs. TRE-BE3RA (D6)   | -82.14 to -45.03   | Yes          | ****    | <0.0001          |
| TRE-BE3 (OFF) vs. TRE-FNLS (D6)    | -86.8 to -49.69    | Yes          | ****    | <0.0001          |
| TRE-BE3RA (OFF) vs. TRE-FNLS (OFF) | -22.47 to 14.64    | No           | ns      | 0.9973           |
| TRE-BE3RA (OFF) vs. TRE-BE3 (D6)   | -19.53 to 17.58    | No           | ns      | >0.9999          |

|                                    |                  |     |      |         |
|------------------------------------|------------------|-----|------|---------|
| TRE-BE3RA (OFF) vs. TRE-BE3RA (D6) | -81.98 to -44.87 | Yes | **** | <0.0001 |
| TRE-BE3RA (OFF) vs. TRE-FNLS (D6)  | -86.64 to -49.53 | Yes | **** | <0.0001 |
| TRE-FNLS (OFF) vs. TRE-BE3 (D6)    | -15.62 to 21.5   | No  | ns   | 0.9996  |
| TRE-FNLS (OFF) vs. TRE-BE3RA (D6)  | -78.07 to -40.95 | Yes | **** | <0.0001 |
| TRE-FNLS (OFF) vs. TRE-FNLS (D6)   | -82.73 to -45.61 | Yes | **** | <0.0001 |
| TRE-BE3 (D6) vs. TRE-BE3RA (D6)    | -81.01 to -43.89 | Yes | **** | <0.0001 |
| TRE-BE3 (D6) vs. TRE-FNLS (D6)     | -85.67 to -48.55 | Yes | **** | <0.0001 |
| TRE-BE3RA (D6) vs. TRE-FNLS (D6)   | -23.22 to 13.9   | No  | ns   | 0.9914  |

## Values for Figure 3a

| Tukey's multiple comparisons test | 95.00% CI of diff. | Significant? | Summary | Adjusted P Value |
|-----------------------------------|--------------------|--------------|---------|------------------|
| Day 0                             |                    |              |         |                  |
| BE3-PGK (DMSO) vs. BE3-PGK (X+T)  | -0.6678 to 0.6678  | No           | ns      | >0.9999          |
| BE3-PGK (DMSO) vs. FNLS (DMSO)    | -0.6678 to 0.6678  | No           | ns      | >0.9999          |
| BE3-PGK (DMSO) vs. FNLS (X+T)     | -0.6678 to 0.6678  | No           | ns      | >0.9999          |
| BE3-PGK (X+T) vs. FNLS (DMSO)     | -0.6678 to 0.6678  | No           | ns      | >0.9999          |
| BE3-PGK (X+T) vs. FNLS (X+T)      | -0.6678 to 0.6678  | No           | ns      | >0.9999          |
| FNLS (DMSO) vs. FNLS (X+T)        | -0.6678 to 0.6678  | No           | ns      | >0.9999          |
| Day 5                             |                    |              |         |                  |
| BE3-PGK (DMSO) vs. BE3-PGK (X+T)  | -0.7954 to 0.5403  | No           | ns      | 0.9543           |
| BE3-PGK (DMSO) vs. FNLS (DMSO)    | -0.6022 to 0.7335  | No           | ns      | 0.9933           |
| BE3-PGK (DMSO) vs. FNLS (X+T)     | -0.8555 to 0.4801  | No           | ns      | 0.8710           |
| BE3-PGK (X+T) vs. FNLS (DMSO)     | -0.4746 to 0.861   | No           | ns      | 0.8612           |
| BE3-PGK (X+T) vs. FNLS (X+T)      | -0.728 to 0.6077   | No           | ns      | 0.9948           |
| FNLS (DMSO) vs. FNLS (X+T)        | -0.9212 to 0.4145  | No           | ns      | 0.7346           |
| Day 10                            |                    |              |         |                  |
| BE3-PGK (DMSO) vs. BE3-PGK (X+T)  | -0.8445 to 0.4912  | No           | ns      | 0.8898           |
| BE3-PGK (DMSO) vs. FNLS (DMSO)    | -0.4538 to 0.8819  | No           | ns      | 0.8210           |
| BE3-PGK (DMSO) vs. FNLS (X+T)     | -1.564 to -0.228   | Yes          | **      | 0.0051           |
| BE3-PGK (X+T) vs. FNLS (DMSO)     | -0.2771 to 1.059   | No           | ns      | 0.4012           |
| BE3-PGK (X+T) vs. FNLS (X+T)      | -1.387 to -0.05139 | Yes          | *       | 0.0309           |
| FNLS (DMSO) vs. FNLS (X+T)        | -1.778 to -0.4421  | Yes          | ***     | 0.0005           |
| Day 15                            |                    |              |         |                  |
| BE3-PGK (DMSO) vs. BE3-PGK (X+T)  | -0.8731 to 0.4626  | No           | ns      | 0.8385           |
| BE3-PGK (DMSO) vs. FNLS (DMSO)    | -0.4711 to 0.8645  | No           | ns      | 0.8548           |
| BE3-PGK (DMSO) vs. FNLS (X+T)     | -1.936 to -0.6001  | Yes          | ****    | <0.0001          |
| BE3-PGK (X+T) vs. FNLS (DMSO)     | -0.2659 to 1.07    | No           | ns      | 0.3763           |
| BE3-PGK (X+T) vs. FNLS (X+T)      | -1.731 to -0.3948  | Yes          | ***     | 0.0008           |
| FNLS (DMSO) vs. FNLS (X+T)        | -2.132 to -0.7968  | Yes          | ****    | <0.0001          |

## Values for Figure 3f

| Tukey's multiple comparisons test | 95.00% CI of diff. | Significant? | Summary | Adjusted P Value |
|-----------------------------------|--------------------|--------------|---------|------------------|
| FNLS sgbCat vs. BE3 sgbCat        | 2.93 to 19.47      | Yes          | **      | 0.0080           |
| FNLS sgbCat vs. FNLS sgCR8        | 2.65 to 21.75      | Yes          | *       | 0.0119           |
| FNLS sgbCat vs. BE3 sgCR8         | 2.65 to 21.75      | Yes          | *       | 0.0119           |
| BE3 sgbCat vs. FNLS sgCR8         | -8.55 to 10.55     | No           | ns      | 0.9891           |
| BE3 sgbCat vs. BE3 sgCR8          | -8.55 to 10.55     | No           | ns      | 0.9891           |
| FNLS sgCR8 vs. BE3 sgCR8          | -10.68 to 10.68    | No           | ns      | >0.9999          |

## Values for Supplementary Figure 1a

| Tukey's multiple comparisons test | 95.00% CI of diff.    | Significant? | Summary | Adjusted P Value |
|-----------------------------------|-----------------------|--------------|---------|------------------|
| BE3-P2A-Puro vs. BE3RA-P2A-Puro   | -11522483 to 12994810 | No           | ns      | >0.9999          |
| BE3-P2A-Puro vs. RA2X-P2A-Puro    | -9567260 to 14950033  | No           | ns      | 0.9931           |
| BE3-P2A-Puro vs. FNLS-P2A-Puro    | -9151143 to 15366150  | No           | ns      | 0.9841           |
| BE3-P2A-Puro vs. BE3-PGK-Puro     | -7106640 to 17410653  | No           | ns      | 0.8191           |
| BE3-P2A-Puro vs. BE3RA-PGK-Puro   | -9263357 to 15253937  | No           | ns      | 0.9871           |
| BE3-P2A-Puro vs. Cas9-P2A-Puro    | -7527070 to 16990223  | No           | ns      | 0.8719           |
| BE3RA-P2A-Puro vs. RA2X-P2A-Puro  | -10303423 to 14213870 | No           | ns      | 0.9990           |
| BE3RA-P2A-Puro vs. FNLS-P2A-Puro  | -9887307 to 14629987  | No           | ns      | 0.9968           |
| BE3RA-P2A-Puro vs. BE3-PGK-Puro   | -7842803 to 16674490  | No           | ns      | 0.9052           |
| BE3RA-P2A-Puro vs. BE3RA-PGK-Puro | -9999520 to 14517773  | No           | ns      | 0.9976           |
| BE3RA-P2A-Puro vs. Cas9-P2A-Puro  | -8263233 to 16254060  | No           | ns      | 0.9407           |
| RA2X-P2A-Puro vs. FNLS-P2A-Puro   | -11842530 to 12674763 | No           | ns      | >0.9999          |
| RA2X-P2A-Puro vs. BE3-PGK-Puro    | -9798027 to 14719267  | No           | ns      | 0.9960           |
| RA2X-P2A-Puro vs. BE3RA-PGK-Puro  | -11954743 to 12562550 | No           | ns      | >0.9999          |
| RA2X-P2A-Puro vs. Cas9-P2A-Puro   | -10218457 to 14298837 | No           | ns      | 0.9987           |
| FNLS-P2A-Puro vs. BE3-PGK-Puro    | -10214143 to 14303150 | No           | ns      | 0.9987           |
| FNLS-P2A-Puro vs. BE3RA-PGK-Puro  | -12370860 to 12146433 | No           | ns      | >0.9999          |
| FNLS-P2A-Puro vs. Cas9-P2A-Puro   | -10634573 to 13882720 | No           | ns      | 0.9997           |
| BE3-PGK-Puro vs. BE3RA-PGK-Puro   | -14415363 to 10101930 | No           | ns      | 0.9982           |
| BE3-PGK-Puro vs. Cas9-P2A-Puro    | -12679077 to 11838217 | No           | ns      | >0.9999          |
| BE3RA-PGK-Puro vs. Cas9-P2A-Puro  | -10522360 to 13994933 | No           | ns      | 0.9996           |

## Values for Supplementary Figure 1b

| Tukey's multiple comparisons test | 95.00% CI of diff. | Significant? | Summary | Adjusted P Value |
|-----------------------------------|--------------------|--------------|---------|------------------|
| BE3-P2A-Puro vs. BE3RA-P2A-Puro   | -3320 to 1588      | No           | ns      | 0.8811           |
| BE3-P2A-Puro vs. RA2X-P2A-Puro    | -2074 to 2835      | No           | ns      | 0.9978           |
| BE3-P2A-Puro vs. FNLS-P2A-Puro    | -3071 to 1838      | No           | ns      | 0.9735           |
| BE3-P2A-Puro vs. BE3-PGK-Puro     | -2428 to 2481      | No           | ns      | >0.9999          |
| BE3-P2A-Puro vs. BE3RA-PGK-Puro   | -2947 to 1962      | No           | ns      | 0.9914           |
| BE3-P2A-Puro vs. Cas9-P2A-Puro    | -2895 to 2014      | No           | ns      | 0.9952           |
| BE3RA-P2A-Puro vs. RA2X-P2A-Puro  | -1208 to 3701      | No           | ns      | 0.6066           |
| BE3RA-P2A-Puro vs. FNLS-P2A-Puro  | -2205 to 2704      | No           | ns      | 0.9998           |
| BE3RA-P2A-Puro vs. BE3-PGK-Puro   | -1562 to 3347      | No           | ns      | 0.8665           |
| BE3RA-P2A-Puro vs. BE3RA-PGK-Puro | -2081 to 2828      | No           | ns      | 0.9980           |
| BE3RA-P2A-Puro vs. Cas9-P2A-Puro  | -2029 to 2880      | No           | ns      | 0.9960           |
| RA2X-P2A-Puro vs. FNLS-P2A-Puro   | -3451 to 1458      | No           | ns      | 0.7999           |
| RA2X-P2A-Puro vs. BE3-PGK-Puro    | -2809 to 2100      | No           | ns      | 0.9986           |
| RA2X-P2A-Puro vs. BE3RA-PGK-Puro  | -3327 to 1582      | No           | ns      | 0.8775           |
| RA2X-P2A-Puro vs. Cas9-P2A-Puro   | -3276 to 1633      | No           | ns      | 0.9041           |
| FNLS-P2A-Puro vs. BE3-PGK-Puro    | -1812 to 3097      | No           | ns      | 0.9676           |
| FNLS-P2A-Puro vs. BE3RA-PGK-Puro  | -2330 to 2579      | No           | ns      | >0.9999          |
| FNLS-P2A-Puro vs. Cas9-P2A-Puro   | -2279 to 2630      | No           | ns      | >0.9999          |
| BE3-PGK-Puro vs. BE3RA-PGK-Puro   | -2973 to 1936      | No           | ns      | 0.9888           |
| BE3-PGK-Puro vs. Cas9-P2A-Puro    | -2921 to 1988      | No           | ns      | 0.9935           |
| BE3RA-PGK-Puro vs. Cas9-P2A-Puro  | -2403 to 2506      | No           | ns      | >0.9999          |

## Values for Supplementary Figure 1c

| Tukey's multiple comparisons test | 95.00% CI of diff.   | Significant? | Summary | Adjusted P Value |
|-----------------------------------|----------------------|--------------|---------|------------------|
| BE3RA-P2A-Puro vs. RA2X-P2A-Puro  | -425709 to 232376    | No           | ns      | 0.9136           |
| BE3RA-P2A-Puro vs. FNLS-P2A-Puro  | -412376 to 245709    | No           | ns      | 0.9514           |
| BE3RA-P2A-Puro vs. BE3-PGK-Puro   | -1565709 to -907624  | Yes          | ****    | <0.0001          |
| BE3RA-P2A-Puro vs. BE3RA-PGK-Puro | -1045709 to -387624  | Yes          | ***     | 0.0001           |
| BE3RA-P2A-Puro vs. Cas9-P2A-Puro  | -1779042 to -1120958 | Yes          | ****    | <0.0001          |
| RA2X-P2A-Puro vs. FNLS-P2A-Puro   | -315709 to 342376    | No           | ns      | >0.9999          |
| RA2X-P2A-Puro vs. BE3-PGK-Puro    | -1469042 to -810958  | Yes          | ****    | <0.0001          |
| RA2X-P2A-Puro vs. BE3RA-PGK-Puro  | -949042 to -290958   | Yes          | ***     | 0.0004           |
| RA2X-P2A-Puro vs. Cas9-P2A-Puro   | -1682376 to -1024291 | Yes          | ****    | <0.0001          |
| FNLS-P2A-Puro vs. BE3-PGK-Puro    | -1482376 to -824291  | Yes          | ****    | <0.0001          |
| FNLS-P2A-Puro vs. BE3RA-PGK-Puro  | -962376 to -304291   | Yes          | ***     | 0.0003           |
| FNLS-P2A-Puro vs. Cas9-P2A-Puro   | -1695709 to -1037624 | Yes          | ****    | <0.0001          |
| BE3-PGK-Puro vs. BE3RA-PGK-Puro   | 190958 to 849042     | Yes          | **      | 0.0020           |
| BE3-PGK-Puro vs. Cas9-P2A-Puro    | -542376 to 115709    | No           | ns      | 0.3141           |
| BE3RA-PGK-Puro vs. Cas9-P2A-Puro  | -1062376 to -404291  | Yes          | ****    | <0.0001          |

## Values for Supplementary Figure 3a/3b

| Sidak's multiple comparisons test | 95.00% CI of diff. | Significant? | Summary | Adjusted P Value |
|-----------------------------------|--------------------|--------------|---------|------------------|
| <b>BE3 vs BE3RA (CTNNB1)</b>      |                    |              |         |                  |
| C4                                | -16.18 to -4.183   | Yes          | ***     | 0.0008           |
| C5                                | -16.55 to -4.556   | Yes          | ***     | 0.0006           |
| C8                                | -16.04 to -4.046   | Yes          | ***     | 0.0009           |
| C10                               | -9.282 to 2.712    | No           | ns      | 0.4973           |
| indels                            | -3.667 to 8.327    | No           | ns      | 0.7952           |
| <b>BE3 vs BE3RA (FANCF)</b>       |                    |              |         |                  |
| C6                                | -9.42 to -3.195    | Yes          | ***     | 0.0001           |
| C7                                | -9.688 to -3.462   | Yes          | ****    | <0.0001          |
| C8                                | -9.445 to -3.22    | Yes          | ***     | 0.0001           |
| C11                               | -7.388 to -1.162   | Yes          | **      | 0.0054           |
| indels                            | -2.935 to 3.29     | No           | ns      | >0.9999          |

### Values for Supplementary Figure 3d

| Tukey's multiple comparisons test | 95.00% CI of diff. | Significant? | Summary | Adjusted P Value |
|-----------------------------------|--------------------|--------------|---------|------------------|
| C>T vs. C>A                       | 7.61 to 16.68      | Yes          | ****    | <0.0001          |
| C>T vs. C>G                       | 6.472 to 15.32     | Yes          | ****    | <0.0001          |
| C>A vs. C>G                       | -5.881 to 3.376    | No           | ns      | 0.7842           |

## Values for Supplementary Figure 5b (FANCF)

| Tukey's multiple comparisons test | 95.00% CI of diff. | Significant? | Summary | Adjusted P Value |
|-----------------------------------|--------------------|--------------|---------|------------------|
| <b>C6</b>                         |                    |              |         |                  |
| BE3 vs. BE3-2X                    | -12.96 to 2.505    | No           | ns      | 0.3322           |
| BE3 vs. BE3-FNLS                  | -21.36 to -5.901   | Yes          | ****    | <0.0001          |
| BE3 vs. BE3-linkFLAG              | -18.19 to -2.731   | Yes          | **      | 0.0028           |
| BE3 vs. BE4                       | -16.24 to 1.613    | No           | ns      | 0.1596           |
| BE3-2X vs. BE3-FNLS               | -14.72 to -2.095   | Yes          | **      | 0.0034           |
| BE3-2X vs. BE3-linkFLAG           | -11.55 to 1.075    | No           | ns      | 0.1504           |
| BE3-2X vs. BE4                    | -9.819 to 5.642    | No           | ns      | 0.9425           |
| BE3-FNLS vs. BE3-linkFLAG         | -3.142 to 9.482    | No           | ns      | 0.6274           |
| BE3-FNLS vs. BE4                  | -1.412 to 14.05    | No           | ns      | 0.1614           |
| BE3-linkFLAG vs. BE4              | -4.582 to 10.88    | No           | ns      | 0.7859           |
| <b>C7</b>                         |                    |              |         |                  |
| BE3 vs. BE3-2X                    | -12.27 to 3.187    | No           | ns      | 0.4756           |
| BE3 vs. BE3-FNLS                  | -19.43 to -3.966   | Yes          | ***     | 0.0006           |
| BE3 vs. BE3-linkFLAG              | -15.95 to -0.4879  | Yes          | *       | 0.0315           |
| BE3 vs. BE4                       | -14.84 to 3.013    | No           | ns      | 0.3525           |
| BE3-2X vs. BE3-FNLS               | -13.47 to -0.8415  | Yes          | *       | 0.0183           |
| BE3-2X vs. BE3-linkFLAG           | -9.987 to 2.637    | No           | ns      | 0.4851           |
| BE3-2X vs. BE4                    | -9.1 to 6.36       | No           | ns      | 0.9876           |
| BE3-FNLS vs. BE3-linkFLAG         | -2.834 to 9.79     | No           | ns      | 0.5402           |
| BE3-FNLS vs. BE4                  | -1.947 to 13.51    | No           | ns      | 0.2348           |
| BE3-linkFLAG vs. BE4              | -5.425 to 10.04    | No           | ns      | 0.9195           |
| <b>C8</b>                         |                    |              |         |                  |
| BE3 vs. BE3-2X                    | -12.15 to 3.315    | No           | ns      | 0.5046           |
| BE3 vs. BE3-FNLS                  | -19.41 to -3.95    | Yes          | ***     | 0.0006           |
| BE3 vs. BE3-linkFLAG              | -15.93 to -0.4679  | Yes          | *       | 0.0322           |
| BE3 vs. BE4                       | -14.79 to 3.066    | No           | ns      | 0.3618           |
| BE3-2X vs. BE3-FNLS               | -13.58 to -0.9532  | Yes          | *       | 0.0159           |
| BE3-2X vs. BE3-linkFLAG           | -10.1 to 2.529     | No           | ns      | 0.4554           |
| BE3-2X vs. BE4                    | -9.175 to 6.285    | No           | ns      | 0.9848           |
| BE3-FNLS vs. BE3-linkFLAG         | -2.83 to 9.794     | No           | ns      | 0.5392           |
| BE3-FNLS vs. BE4                  | -1.91 to 13.55     | No           | ns      | 0.2292           |
| BE3-linkFLAG vs. BE4              | -5.392 to 10.07    | No           | ns      | 0.9155           |
| <b>C11</b>                        |                    |              |         |                  |
| BE3 vs. BE3-2X                    | -16.73 to -1.265   | Yes          | *       | 0.0144           |
| BE3 vs. BE3-FNLS                  | -19.2 to -3.74     | Yes          | ***     | 0.0008           |
| BE3 vs. BE3-linkFLAG              | -16.93 to -1.471   | Yes          | *       | 0.0115           |
| BE3 vs. BE4                       | -17.1 to 0.7563    | No           | ns      | 0.0889           |
| BE3-2X vs. BE3-FNLS               | -8.787 to 3.837    | No           | ns      | 0.8082           |
| BE3-2X vs. BE3-linkFLAG           | -6.519 to 6.105    | No           | ns      | >0.9999          |
| BE3-2X vs. BE4                    | -6.905 to 8.555    | No           | ns      | 0.9982           |
| BE3-FNLS vs. BE3-linkFLAG         | -4.044 to 8.58     | No           | ns      | 0.8527           |
| BE3-FNLS vs. BE4                  | -4.43 to 11.03     | No           | ns      | 0.7554           |
| BE3-linkFLAG vs. BE4              | -6.699 to 8.762    | No           | ns      | 0.9958           |

## Values for Supplementary Figure 5b (CTNNB1)

| Tukey's multiple comparisons test | 95.00% CI of diff. | Significant? | Summary | Adjusted P Value |
|-----------------------------------|--------------------|--------------|---------|------------------|
| <b>C4</b>                         |                    |              |         |                  |
| BE3-2X vs. BE3-FNLS               | -20.82 to -0.107   | Yes          | *       | 0.0468           |
| BE3-2X vs. BE3-LinkFLAG           | -13.81 to 8.158    | No           | ns      | 0.9030           |
| BE3-2X vs. BE4                    | -16.92 to 6.994    | No           | ns      | 0.6900           |
| BE3-FNLS vs. BE3-LinkFLAG         | -3.349 to 18.62    | No           | ns      | 0.2644           |
| BE3-FNLS vs. BE4                  | -6.461 to 17.46    | No           | ns      | 0.6169           |
| BE3-LinkFLAG vs. BE4              | -14.65 to 10.37    | No           | ns      | 0.9686           |
| <b>C5</b>                         |                    |              |         |                  |
| BE3-2X vs. BE3-FNLS               | -20.15 to 0.5665   | No           | ns      | 0.0702           |
| BE3-2X vs. BE3-LinkFLAG           | -13.17 to 8.805    | No           | ns      | 0.9522           |
| BE3-2X vs. BE4                    | -16.71 to 7.213    | No           | ns      | 0.7190           |
| BE3-FNLS vs. BE3-LinkFLAG         | -3.375 to 18.6     | No           | ns      | 0.2673           |
| BE3-FNLS vs. BE4                  | -6.915 to 17       | No           | ns      | 0.6793           |
| BE3-LinkFLAG vs. BE4              | -15.07 to 9.942    | No           | ns      | 0.9476           |
| <b>C8</b>                         |                    |              |         |                  |
| BE3-2X vs. BE3-FNLS               | -19.46 to 1.254    | No           | ns      | 0.1037           |
| BE3-2X vs. BE3-LinkFLAG           | -13.13 to 8.843    | No           | ns      | 0.9545           |
| BE3-2X vs. BE4                    | -16.28 to 7.639    | No           | ns      | 0.7732           |
| BE3-FNLS vs. BE3-LinkFLAG         | -4.024 to 17.95    | No           | ns      | 0.3435           |
| BE3-FNLS vs. BE4                  | -7.177 to 16.74    | No           | ns      | 0.7143           |
| BE3-LinkFLAG vs. BE4              | -14.69 to 10.33    | No           | ns      | 0.9669           |
| <b>C10</b>                        |                    |              |         |                  |
| BE3-2X vs. BE3-FNLS               | -2.136 to 18.58    | No           | ns      | 0.1645           |
| BE3-2X vs. BE3-LinkFLAG           | -6.685 to 15.29    | No           | ns      | 0.7275           |
| BE3-2X vs. BE4                    | -8.253 to 15.67    | No           | ns      | 0.8436           |
| BE3-FNLS vs. BE3-LinkFLAG         | -14.91 to 7.065    | No           | ns      | 0.7795           |
| BE3-FNLS vs. BE4                  | -16.47 to 7.444    | No           | ns      | 0.7489           |
| BE3-LinkFLAG vs. BE4              | -13.1 to 11.91     | No           | ns      | 0.9993           |

## Values for Supplementary Figure 5c

| Tukey's multiple comparisons test | 95.00% CI of diff.    | Significant? | Summary | Adjusted P Value |
|-----------------------------------|-----------------------|--------------|---------|------------------|
| <b>FANCF</b>                      |                       |              |         |                  |
| BE3 vs. BE3-2X                    | -0.5268 to 8.493e-006 | No           | ns      | 0.0500           |
| BE3 vs. FNLS                      | -0.3287 to 0.1981     | No           | ns      | 0.9511           |
| BE3 vs. linkFLAG                  | -0.2977 to 0.2291     | No           | ns      | 0.9955           |
| BE3 vs. BE4                       | -0.3861 to 0.1771     | No           | ns      | 0.8191           |
| BE3-2X vs. FNLS                   | 0.05725 to 0.3388     | Yes          | **      | 0.0025           |
| BE3-2X vs. linkFLAG               | 0.08832 to 0.3699     | Yes          | ***     | 0.0004           |
| BE3-2X vs. BE4                    | -0.01356 to 0.3313    | No           | ns      | 0.0826           |
| FNLS vs. linkFLAG                 | -0.1097 to 0.1719     | No           | ns      | 0.9677           |
| FNLS vs. BE4                      | -0.2116 to 0.1333     | No           | ns      | 0.9642           |
| linkFLAG vs. BE4                  | -0.2427 to 0.1022     | No           | ns      | 0.7642           |
| <b>CTNNB1</b>                     |                       |              |         |                  |
| BE3-2X vs. FNLS                   | 0.5218 to 0.8172      | Yes          | ****    | <0.0001          |
| BE3-2X vs. linkFLAG               | 0.2102 to 0.525       | Yes          | ****    | <0.0001          |
| BE3-2X vs. BE4                    | 0.225 to 0.5699       | Yes          | ****    | <0.0001          |
| FNLS vs. linkFLAG                 | -0.4655 to -0.1383    | Yes          | ****    | <0.0001          |
| FNLS vs. BE4                      | -0.4501 to -0.09394   | Yes          | ***     | 0.0010           |
| linkFLAG vs. BE4                  | -0.1564 to 0.2161     | No           | ns      | 0.9901           |

## Values for Supplementary Figure 6c

| Tukey's multiple comparisons test             | 95.00% CI of diff. | Significant? | Summary | Adjusted P Value |
|-----------------------------------------------|--------------------|--------------|---------|------------------|
| BE3 <sup>RA</sup> -P2A-Puro vs. FNLS-P2A-Puro | -18.03 to 4.166    | No           | ns      | 0.2143           |
| BE3 <sup>RA</sup> -P2A-Puro vs. 2X-P2A-Puro   | -13.42 to 8.777    | No           | ns      | 0.8037           |
| FNLS-P2A-Puro vs. 2X-P2A-Puro                 | -6.487 to 15.71    | No           | ns      | 0.4577           |

## Values for Supplementary Figure 7c

| Tukey's multiple comparisons test | 95.00% CI of diff. | Significant? | Summary | Adjusted P Value |
|-----------------------------------|--------------------|--------------|---------|------------------|
| C>T vs. C>A                       | 0.4776 to 1.156    | Yes          | ****    | <0.0001          |
| C>T vs. C>G                       | 0.1716 to 0.8496   | Yes          | **      | 0.0024           |
| C>A vs. C>G                       | -0.6601 to 0.04808 | No           | ns      | 0.1004           |

## Values for Supplementary Figure 8a

### H23 – FANCF

| Tukey's multiple comparisons test | 95.00% CI of diff. | Significant? | Summary | Adjusted P Value |
|-----------------------------------|--------------------|--------------|---------|------------------|
| C6                                |                    |              |         |                  |
| BE3-PGK-Puro vs. FNLS-P2A-Puro    | -47.86 to -36.39   | Yes          | ****    | <0.0001          |
| BE3-PGK-Puro vs. BE4Gam           | -41.12 to -28.28   | Yes          | ****    | <0.0001          |
| FNLS-P2A-Puro vs. BE4Gam          | 1.008 to 13.84     | Yes          | *       | 0.0217           |
| C7                                |                    |              |         |                  |
| BE3-PGK-Puro vs. FNLS-P2A-Puro    | -34.72 to -23.25   | Yes          | ****    | <0.0001          |
| BE3-PGK-Puro vs. BE4Gam           | -31.54 to -18.71   | Yes          | ****    | <0.0001          |
| FNLS-P2A-Puro vs. BE4Gam          | -2.557 to 10.27    | No           | ns      | 0.3024           |
| C8                                |                    |              |         |                  |
| BE3-PGK-Puro vs. FNLS-P2A-Puro    | -34.76 to -23.29   | Yes          | ****    | <0.0001          |
| BE3-PGK-Puro vs. BE4Gam           | -30.37 to -17.53   | Yes          | ****    | <0.0001          |
| FNLS-P2A-Puro vs. BE4Gam          | -1.342 to 11.49    | No           | ns      | 0.1379           |
| C11                               |                    |              |         |                  |
| BE3-PGK-Puro vs. FNLS-P2A-Puro    | -16.51 to -5.035   | Yes          | ***     | 0.0003           |
| BE3-PGK-Puro vs. BE4Gam           | -17.14 to -4.307   | Yes          | **      | 0.0011           |
| FNLS-P2A-Puro vs. BE4Gam          | -6.363 to 6.467    | No           | ns      | 0.9998           |

### H23 – CTNNB1

| Tukey's multiple comparisons test | 95.00% CI of diff. | Significant? | Summary | Adjusted P Value |
|-----------------------------------|--------------------|--------------|---------|------------------|
| C4                                |                    |              |         |                  |
| BE3-PGK-Puro vs. FNLS-P2A-Puro    | -33.36 to -29.45   | Yes          | ****    | <0.0001          |
| BE3-PGK-Puro vs. BE4Gam           | -21.76 to -17.4    | Yes          | ****    | <0.0001          |
| FNLS-P2A-Puro vs. BE4Gam          | 9.643 to 14.01     | Yes          | ****    | <0.0001          |
| C5                                |                    |              |         |                  |
| BE3-PGK-Puro vs. FNLS-P2A-Puro    | -25.1 to -21.2     | Yes          | ****    | <0.0001          |
| BE3-PGK-Puro vs. BE4Gam           | -18.29 to -13.93   | Yes          | ****    | <0.0001          |
| FNLS-P2A-Puro vs. BE4Gam          | 4.859 to 9.224     | Yes          | ****    | <0.0001          |
| C8                                |                    |              |         |                  |
| BE3-PGK-Puro vs. FNLS-P2A-Puro    | -25.22 to -21.32   | Yes          | ****    | <0.0001          |
| BE3-PGK-Puro vs. BE4Gam           | -15.69 to -11.32   | Yes          | ****    | <0.0001          |
| FNLS-P2A-Puro vs. BE4Gam          | 7.584 to 11.95     | Yes          | ****    | <0.0001          |
| C10                               |                    |              |         |                  |
| BE3-PGK-Puro vs. FNLS-P2A-Puro    | -3.832 to 0.07192  | No           | ns      | 0.0603           |
| BE3-PGK-Puro vs. BE4Gam           | -3.009 to 1.356    | No           | ns      | 0.6108           |
| FNLS-P2A-Puro vs. BE4Gam          | -1.129 to 3.236    | No           | ns      | 0.4549           |



## Values for Supplementary Figure 8a continued...

### ***DLD1 – FANCF***

| Tukey's multiple comparisons test | 95.00% CI of diff. | Significant? | Summary | Adjusted P Value |
|-----------------------------------|--------------------|--------------|---------|------------------|
| C6                                |                    |              |         |                  |
| BE3-PGK-Puro vs. FNLS-P2A-Puro    | -56.62 to -46.84   | Yes          | ****    | <0.0001          |
| BE3-PGK-Puro vs. BE4Gam           | -54.99 to -45.21   | Yes          | ****    | <0.0001          |
| FNLS-P2A-Puro vs. BE4Gam          | -3.258 to 6.524    | No           | ns      | 0.6862           |
| C7                                |                    |              |         |                  |
| BE3-PGK-Puro vs. FNLS-P2A-Puro    | -52.99 to -43.21   | Yes          | ****    | <0.0001          |
| BE3-PGK-Puro vs. BE4Gam           | -49.87 to -40.09   | Yes          | ****    | <0.0001          |
| FNLS-P2A-Puro vs. BE4Gam          | -1.769 to 8.013    | No           | ns      | 0.2676           |
| C8                                |                    |              |         |                  |
| BE3-PGK-Puro vs. FNLS-P2A-Puro    | -52.23 to -42.45   | Yes          | ****    | <0.0001          |
| BE3-PGK-Puro vs. BE4Gam           | -49.31 to -39.53   | Yes          | ****    | <0.0001          |
| FNLS-P2A-Puro vs. BE4Gam          | -1.97 to 7.812     | No           | ns      | 0.3125           |
| C11                               |                    |              |         |                  |
| BE3-PGK-Puro vs. FNLS-P2A-Puro    | -39.07 to -29.29   | Yes          | ****    | <0.0001          |
| BE3-PGK-Puro vs. BE4Gam           | -35.13 to -25.35   | Yes          | ****    | <0.0001          |
| FNLS-P2A-Puro vs. BE4Gam          | -0.956 to 8.826    | No           | ns      | 0.1316           |

### ***DLD1 – CTNNB1***

| Tukey's multiple comparisons test | 95.00% CI of diff. | Significant? | Summary | Adjusted P Value |
|-----------------------------------|--------------------|--------------|---------|------------------|
| C4                                |                    |              |         |                  |
| BE3-PGK-Puro vs. FNLS-P2A-Puro    | -22.84 to -14.19   | Yes          | ****    | <0.0001          |
| BE3-PGK-Puro vs. BE4Gam-P2A-Puro  | -7.667 to 0.9739   | No           | ns      | 0.1509           |
| FNLS-P2A-Puro vs. BE4Gam-P2A-Puro | 10.85 to 19.49     | Yes          | ****    | <0.0001          |
| C5                                |                    |              |         |                  |
| BE3-PGK-Puro vs. FNLS-P2A-Puro    | -21.35 to -12.71   | Yes          | ****    | <0.0001          |
| BE3-PGK-Puro vs. BE4Gam-P2A-Puro  | -7.584 to 1.057    | No           | ns      | 0.1644           |
| FNLS-P2A-Puro vs. BE4Gam-P2A-Puro | 9.446 to 18.09     | Yes          | ****    | <0.0001          |
| C8                                |                    |              |         |                  |
| BE3-PGK-Puro vs. FNLS-P2A-Puro    | -21.5 to -12.86    | Yes          | ****    | <0.0001          |
| BE3-PGK-Puro vs. BE4Gam-P2A-Puro  | -7.351 to 1.291    | No           | ns      | 0.2074           |
| FNLS-P2A-Puro vs. BE4Gam-P2A-Puro | 9.825 to 18.47     | Yes          | ****    | <0.0001          |
| C10                               |                    |              |         |                  |
| BE3-PGK-Puro vs. FNLS-P2A-Puro    | -7.312 to 1.329    | No           | ns      | 0.2152           |
| BE3-PGK-Puro vs. BE4Gam-P2A-Puro  | -5.291 to 3.351    | No           | ns      | 0.8420           |
| FNLS-P2A-Puro vs. BE4Gam-P2A-Puro | -2.299 to 6.342    | No           | ns      | 0.4829           |

## Values for Supplementary Figure 8b (Indels)

### ***DLD1 – FANCF***

| Tukey's multiple comparisons test | 95.00% CI of diff. | Significant? | Summary | Adjusted P Value |
|-----------------------------------|--------------------|--------------|---------|------------------|
| BE3-PGK-Puro vs. BE3RA-P2A-Puro   | -41.54 to -32.51   | Yes          | ****    | <0.0001          |
| BE3-PGK-Puro vs. FNLS-P2A-Puro    | -25.2 to -16.17    | Yes          | ****    | <0.0001          |
| BE3-PGK-Puro vs. BE4Gam           | -17.22 to -8.19    | Yes          | ****    | <0.0001          |
| BE3RA-P2A-Puro vs. FNLS-P2A-Puro  | 11.83 to 20.86     | Yes          | ****    | <0.0001          |
| BE3RA-P2A-Puro vs. BE4Gam         | 19.8 to 28.84      | Yes          | ****    | <0.0001          |
| FNLS-P2A-Puro vs. BE4Gam          | 3.459 to 12.49     | Yes          | **      | 0.0021           |

### ***DLD1 – CTNNB1***

| Tukey's multiple comparisons test | 95.00% CI of diff. | Significant? | Summary | Adjusted P Value |
|-----------------------------------|--------------------|--------------|---------|------------------|
| BE3-PGK-Puro vs. BE3RA-P2A-Puro   | -8.174 to -4.011   | Yes          | ****    | <0.0001          |
| BE3-PGK-Puro vs. FNLS-P2A-Puro    | -6.308 to -2.145   | Yes          | ***     | 0.0008           |
| BE3-PGK-Puro vs. BE4Gam           | -2.158 to 2.005    | No           | ns      | 0.9994           |
| BE3RA-P2A-Puro vs. FNLS-P2A-Puro  | -0.2155 to 3.947   | No           | ns      | 0.0798           |
| BE3RA-P2A-Puro vs. BE4Gam         | 3.935 to 8.098     | Yes          | ****    | <0.0001          |
| FNLS-P2A-Puro vs. BE4Gam          | 2.069 to 6.232     | Yes          | ***     | 0.0010           |

### ***PC9 – FANCF***

| Tukey's multiple comparisons test | 95.00% CI of diff. | Significant? | Summary | Adjusted P Value |
|-----------------------------------|--------------------|--------------|---------|------------------|
| BE3-PGK-Puro vs. FNLS-P2A-Puro    | -9.517 to -7.977   | Yes          | ****    | <0.0001          |
| BE3-PGK-Puro vs. BE4Gam           | -5.017 to -3.477   | Yes          | ****    | <0.0001          |
| FNLS-P2A-Puro vs. BE4Gam          | 3.73 to 5.27       | Yes          | ****    | <0.0001          |

### ***PC9 – CTNNB1***

| Tukey's multiple comparisons test | 95.00% CI of diff. | Significant? | Summary | Adjusted P Value |
|-----------------------------------|--------------------|--------------|---------|------------------|
| BE3-PGK-Puro vs. FNLS-P2A-Puro    | -5.579 to -4.034   | Yes          | ****    | <0.0001          |
| BE3-PGK-Puro vs. BE4Gam           | -1.929 to -0.3845  | Yes          | **      | 0.0088           |
| FNLS-P2A-Puro vs. BE4Gam          | 2.878 to 4.422     | Yes          | ****    | <0.0001          |

### ***H23 - FANCF***

| Tukey's multiple comparisons test | 95.00% CI of diff. | Significant? | Summary | Adjusted P Value |
|-----------------------------------|--------------------|--------------|---------|------------------|
| BE3-PGK-Puro vs. FNLS-P2A-Puro    | -33.48 to -20.97   | Yes          | ****    | <0.0001          |

### ***H23 - CTNNB1***

| Tukey's multiple comparisons test | 95.00% CI of diff. | Significant? | Summary | Adjusted P Value |
|-----------------------------------|--------------------|--------------|---------|------------------|
| BE3-PGK-Puro vs. FNLS-P2A-Puro    | -48.65 to -32.17   | Yes          | ****    | <0.0001          |

## Values for Supplementary Figure 11c (FANCF: RA vs 2X)

| Tukey's multiple comparisons test | 95.00% CI of diff. | Significant? | Summary | Adjusted P Value |
|-----------------------------------|--------------------|--------------|---------|------------------|
| <b>C6</b>                         |                    |              |         |                  |
| BE3-PGK-Puro vs. BE3RA-P2A-Puro   | -36.57 to -33.3    | Yes          | ****    | <0.0001          |
| BE3-PGK-Puro vs. 2X-P2A-Puro      | -42.01 to -38.75   | Yes          | ****    | <0.0001          |
| BE3RA-P2A-Puro vs. 2X-P2A-Puro    | -7.079 to -3.817   | Yes          | ****    | <0.0001          |
| <b>C7</b>                         |                    |              |         |                  |
| BE3-PGK-Puro vs. BE3RA-P2A-Puro   | -31.83 to -28.57   | Yes          | ****    | <0.0001          |
| BE3-PGK-Puro vs. 2X-P2A-Puro      | -37.51 to -34.25   | Yes          | ****    | <0.0001          |
| BE3RA-P2A-Puro vs. 2X-P2A-Puro    | -7.309 to -4.046   | Yes          | ****    | <0.0001          |
| <b>C8</b>                         |                    |              |         |                  |
| BE3-PGK-Puro vs. BE3RA-P2A-Puro   | -30.15 to -26.89   | Yes          | ****    | <0.0001          |
| BE3-PGK-Puro vs. 2X-P2A-Puro      | -36.72 to -33.46   | Yes          | ****    | <0.0001          |
| BE3RA-P2A-Puro vs. 2X-P2A-Puro    | -8.197 to -4.934   | Yes          | ****    | <0.0001          |
| <b>C11</b>                        |                    |              |         |                  |
| BE3-PGK-Puro vs. BE3RA-P2A-Puro   | -16.88 to -13.62   | Yes          | ****    | <0.0001          |
| BE3-PGK-Puro vs. 2X-P2A-Puro      | -33.68 to -30.41   | Yes          | ****    | <0.0001          |
| BE3RA-P2A-Puro vs. 2X-P2A-Puro    | -18.42 to -15.16   | Yes          | ****    | <0.0001          |

## Values for Supplementary Figure 11d (CTNNB1: RA vs 2X)

| Tukey's multiple comparisons test | 95.00% CI of diff. | Significant? | Summary | Adjusted P Value |
|-----------------------------------|--------------------|--------------|---------|------------------|
| <b>C4</b>                         |                    |              |         |                  |
| BE3-PGK-Puro vs. BE3RA-P2A-Puro   | -20.36 to -7.943   | Yes          | ****    | <0.0001          |
| BE3-PGK-Puro vs. 2X-P2A-Puro      | -24.73 to -12.32   | Yes          | ****    | <0.0001          |
| BE3RA-P2A-Puro vs. 2X-P2A-Puro    | -10.58 to 1.832    | No           | ns      | 0.2044           |
| <b>C5</b>                         |                    |              |         |                  |
| BE3-PGK-Puro vs. BE3RA-P2A-Puro   | -18.79 to -6.38    | Yes          | ***     | 0.0001           |
| BE3-PGK-Puro vs. 2X-P2A-Puro      | -24.37 to -11.96   | Yes          | ****    | <0.0001          |
| BE3RA-P2A-Puro vs. 2X-P2A-Puro    | -11.79 to 0.6258   | No           | ns      | 0.0837           |
| <b>C8</b>                         |                    |              |         |                  |
| BE3-PGK-Puro vs. BE3RA-P2A-Puro   | -18.87 to -6.455   | Yes          | ****    | <0.0001          |
| BE3-PGK-Puro vs. 2X-P2A-Puro      | -24.83 to -12.41   | Yes          | ****    | <0.0001          |
| BE3RA-P2A-Puro vs. 2X-P2A-Puro    | -12.16 to 0.2498   | No           | ns      | 0.0617           |
| <b>C10</b>                        |                    |              |         |                  |
| BE3-PGK-Puro vs. BE3RA-P2A-Puro   | -8.23 to 4.183     | No           | ns      | 0.6980           |
| BE3-PGK-Puro vs. 2X-P2A-Puro      | -23.43 to -11.02   | Yes          | ****    | <0.0001          |
| BE3RA-P2A-Puro vs. 2X-P2A-Puro    | -21.41 to -8.992   | Yes          | ****    | <0.0001          |

## Values for Supplementary Figure 11e (Ctnnb1: RA vs 2X vs FNLS)

| Tukey's multiple comparisons test | 95.00% CI of diff. | Significant? | Summary | Adjusted P Value |
|-----------------------------------|--------------------|--------------|---------|------------------|
| C4>T                              |                    |              |         |                  |
| BE3RA-P2A-Puro vs. 2X-P2A-Puro    | 0.6187 to 4.948    | Yes          | **      | 0.0091           |
| BE3RA-P2A-Puro vs. FNLS-P2A-Puro  | -16.43 to -12.1    | Yes          | ****    | <0.0001          |
| 2X-P2A-Puro vs. FNLS-P2A-Puro     | -19.21 to -14.88   | Yes          | ****    | <0.0001          |
| C5>T                              |                    |              |         |                  |
| BE3RA-P2A-Puro vs. 2X-P2A-Puro    | 1.579 to 5.908     | Yes          | ***     | 0.0004           |
| BE3RA-P2A-Puro vs. FNLS-P2A-Puro  | -16.83 to -12.51   | Yes          | ****    | <0.0001          |
| 2X-P2A-Puro vs. FNLS-P2A-Puro     | -20.58 to -16.25   | Yes          | ****    | <0.0001          |
| C8>T                              |                    |              |         |                  |
| BE3RA-P2A-Puro vs. 2X-P2A-Puro    | -10.27 to -5.942   | Yes          | ****    | <0.0001          |
| BE3RA-P2A-Puro vs. FNLS-P2A-Puro  | -13.53 to -9.205   | Yes          | ****    | <0.0001          |
| 2X-P2A-Puro vs. FNLS-P2A-Puro     | -5.428 to -1.099   | Yes          | **      | 0.0021           |
| C9>T                              |                    |              |         |                  |
| BE3RA-P2A-Puro vs. 2X-P2A-Puro    | -25.35 to -21.02   | Yes          | ****    | <0.0001          |
| BE3RA-P2A-Puro vs. FNLS-P2A-Puro  | -3.081 to 1.248    | No           | ns      | 0.5599           |
| 2X-P2A-Puro vs. FNLS-P2A-Puro     | 20.11 to 24.43     | Yes          | ****    | <0.0001          |
| C10>T                             |                    |              |         |                  |
| BE3RA-P2A-Puro vs. 2X-P2A-Puro    | -19.22 to -14.89   | Yes          | ****    | <0.0001          |
| BE3RA-P2A-Puro vs. FNLS-P2A-Puro  | -2.465 to 1.865    | No           | ns      | 0.9388           |
| 2X-P2A-Puro vs. FNLS-P2A-Puro     | 14.59 to 18.92     | Yes          | ****    | <0.0001          |
| indels                            |                    |              |         |                  |
| BE3RA-P2A-Puro vs. 2X-P2A-Puro    | -2.281 to 2.048    | No           | ns      | 0.9905           |
| BE3RA-P2A-Puro vs. FNLS-P2A-Puro  | -1.855 to 2.475    | No           | ns      | 0.9348           |
| 2X-P2A-Puro vs. FNLS-P2A-Puro     | -1.738 to 2.591    | No           | ns      | 0.8803           |
